# Supplementary material for: Enhancing curcumin's solubility and antibiofilm activityviasilica surface modification
Source: Royal Society of Chemistry journal article supplement (doi:10.1039/d0na00041h), 2020-01-01
Supplement: d0na00041h1.pdf [file d0na00041h1.pdf]

## SUPPLEMENTARY INFORMATION

# Enhancing curcumin's solubility and antibiofilm activity via silica surface modification

Caio H. N. Barros,<sup>a</sup> Henry Devlin,<sup>a</sup> Dishon W. Hiebner,<sup>a</sup> Stefania Vitale,<sup>a</sup> Laura Quinn<sup>a</sup> and Eoin Casey<sup>a,\*</sup>

<sup>a</sup>School of Chemical and Bioprocess Engineering, University College Dublin, Ireland

\*Corresponding author: [eoin.casey@ucd.ie](mailto:eoin.casey@ucd.ie)

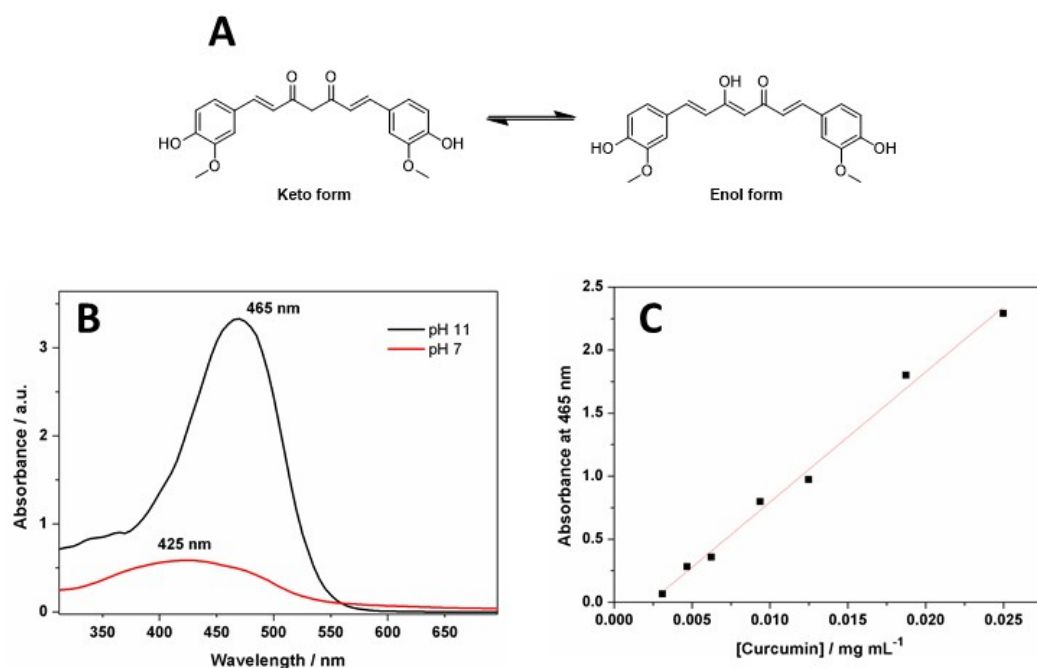

**Figure S1.** Tautomerism of curcumin between keto and enol form (A) UV-visible absorption spectra of curcumin at pH 7 (keto isomer) and pH 11 (enol isomer) (B) and calibration curve of curcumin at pH 11 (C)

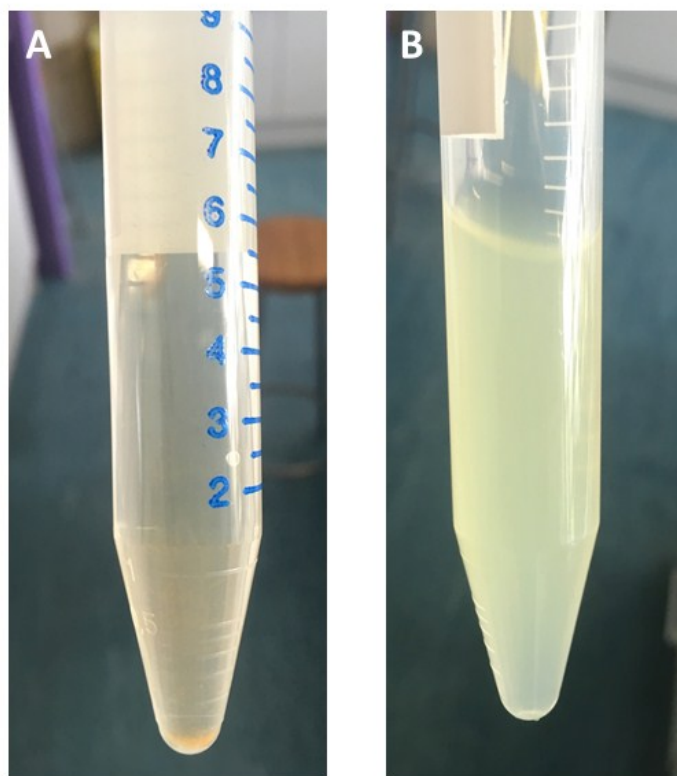

**Figure S2.** Photographic image of a  $0.05 \text{ mg mL}^{-1}$  free curcumin aqueous solution showing precipitation as a result of poor solubility of curcumin in water (A) and suspension of curc-NPs in water at  $5.0 \text{ mg mL}^{-1}$  (B).

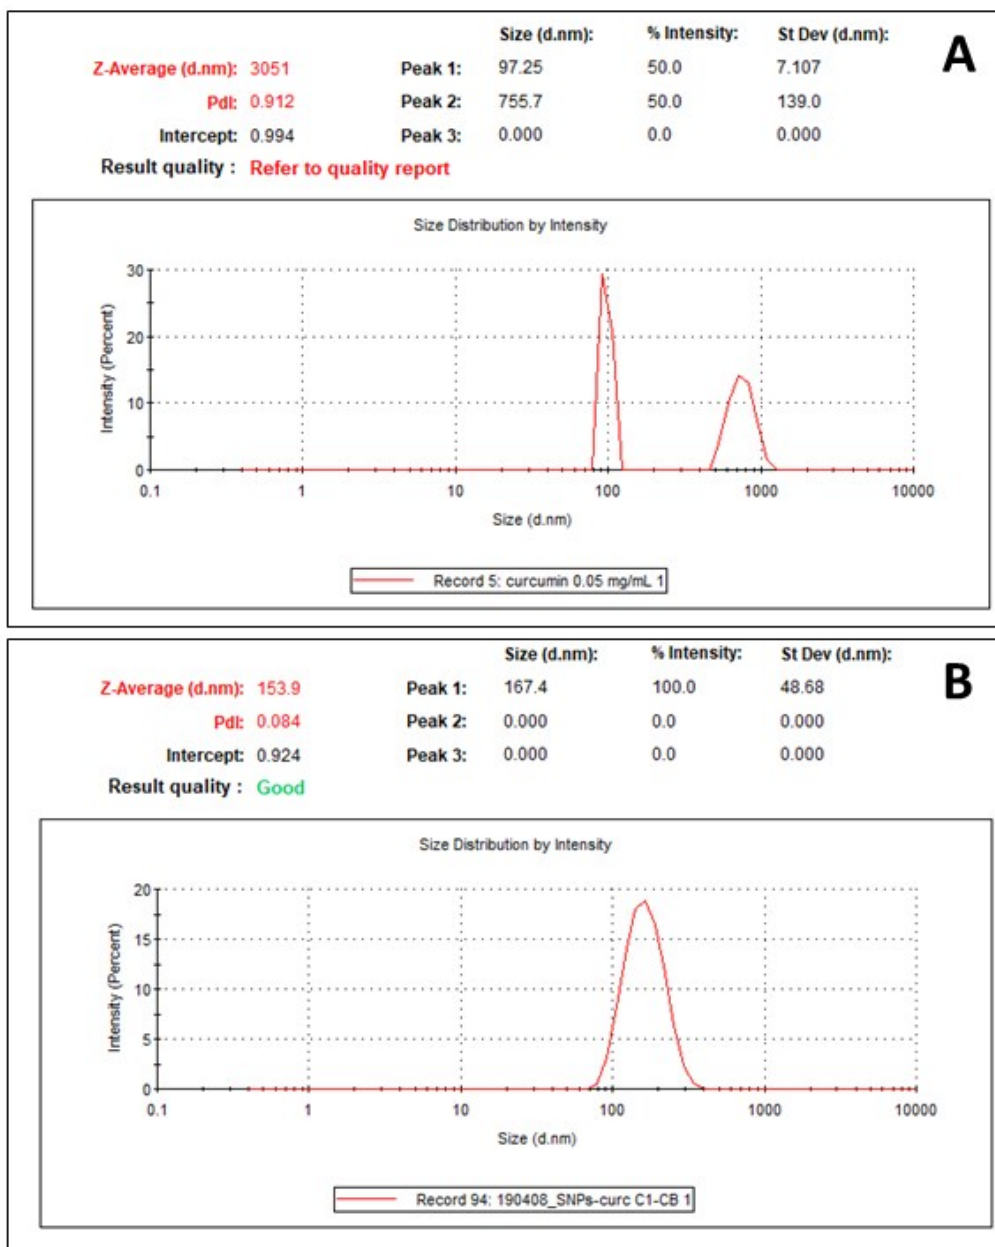

**Figure S3.** Dynamic Light Scattering intensity profile of free curcumin at 0.05 mg mL<sup>-1</sup> (A) and curc-NPs at 5.0 mg mL<sup>-1</sup> (B).

**Table S1.** Proteins identified using LC-MS/MS in biofilm EPS fractions cultured under three different conditions

| <b>Control</b>                              |                                                                   |
|---------------------------------------------|-------------------------------------------------------------------|
| <b>Uniprot</b>                              | <b>Protein name</b>                                               |
| P59374                                      | 30S ribosomal protein S11                                         |
| Q88BX2                                      | ATP synthase subunit alpha                                        |
| Q88DE8                                      | 30S ribosomal protein S6                                          |
| Q88DU1                                      | Protein GrpE                                                      |
| Q88FB9                                      | Chaperone protein HtpG                                            |
| Q88MF9                                      | Enolase                                                           |
| Q88MI0                                      | 30S ribosomal protein S2                                          |
| Q88N55                                      | 60 kDa chaperonin                                                 |
| Q88PK1                                      | Nucleoside diphosphate kinase                                     |
| Q88Q27                                      | K Serine hydroxymethyltransferase 2                               |
| Q88Q71                                      | Chaperone protein ClpB                                            |
| Q88QL2                                      | 30S ribosomal protein S4                                          |
| Q88QL8                                      | 30S ribosomal protein S5                                          |
| Q88QL9                                      | 50S ribosomal protein L18                                         |
| Q88QN0                                      | 50S ribosomal protein L22                                         |
| Q88QN2                                      | 50S ribosomal protein L2                                          |
| Q88QN5                                      | 50S ribosomal protein L3                                          |
| Q88QN6                                      | 30S ribosomal protein S10                                         |
| Q88QP8                                      | Elongation factor Tu-A                                            |
| Q88QP1                                      | DNA-directed RNA polymerase subunit beta                          |
| Q88QP2                                      | DNA-directed RNA polymerase subunit beta                          |
| Q88CY3                                      | Glutamine synthetase                                              |
| Q88FA9                                      | 2-oxoglutarate decarboxylase, thiamine-requiring E1 subunit       |
| Q88K29                                      | Nucleic acid cold-shock chaperone                                 |
| Q88K38                                      | Ribose ABC transporter, periplasmic ribose-binding subunit        |
| Q88KS2                                      | Enoyl-CoA hydratase                                               |
| Q88M19                                      | DUF2059 domain-containing protein                                 |
| Q88NY2                                      | Glutamate / aspartate ABC transporter-periplasmic binding protein |
| Q88P44                                      | Glyceraldehyde-3-phosphate dehydrogenase                          |
| Q88P78                                      | Putative DNA-binding protein HU, form N                           |
| Q88RA6                                      | Periplasmic cystine-binding protein                               |
| Q88P44                                      | Glyceraldehyde-3-phosphate dehydrogenase                          |
| Q88P78                                      | Putative DNA-binding protein HU, form N                           |
| Q88RA6                                      | Periplasmic cystine-binding protein                               |
| <b>Exposure to free curcumin 0.05 mg/mL</b> |                                                                   |
| <b>Uniprot</b>                              | <b>Protein name</b>                                               |
| P0A136                                      | Adenylate kinase                                                  |
| P0A138                                      | Peptidoglycan-associated lipoprotein                              |
| P0A157                                      | 50S ribosomal protein L7/L12                                      |
| P0A165                                      | 30S ribosomal protein S21                                         |
| P0A173                                      | Tol-Pal system protein TolB                                       |

|        |                                                             |
|--------|-------------------------------------------------------------|
| Q88BX0 | ATP synthase subunit b                                      |
| Q88BX2 | ATP synthase subunit alpha                                  |
| Q88BX3 | ATP synthase gamma chain                                    |
| Q88BX4 | ATP synthase subunit beta                                   |
| Q88BX5 | ATP synthase epsilon chain                                  |
| Q88CQ2 | Dihydroxy-acid dehydratase                                  |
| Q88CX4 | 2,3-bisphosphoglycerate-independent phosphoglycerate mutase |
| Q88D47 | UPF0312 protein PP_4981                                     |
| Q88DE8 | 30S ribosomal protein S6                                    |
| Q88DF1 | 50S ribosomal protein L9                                    |
| Q88DK3 | Bifunctional purine biosynthesis protein PurH               |
| Q88DU1 | Protein GrpE                                                |
| Q88DU2 | Chaperone protein DnaK                                      |
| Q88DU6 | Carbamoyl-phosphate synthase large chain                    |
| Q88DU7 | Transcription elongation factor GreA                        |
| Q88DV9 | 30S ribosomal protein S15                                   |
| Q88LW9 | Glucose-6-phosphate isomerase 1                             |
| Q88DZ0 | Ketol-acid reductoisomerase (NADP(+))                       |
| Q88EI9 | Aspartate kinase                                            |
| Q88FB2 | Succinate--CoA ligase [ADP-forming] subunit beta            |
| Q88FB9 | Chaperone protein HtpG                                      |
| Q88FT2 | Serine--tRNA ligase                                         |
| Q88G93 | Translational regulator CsrA                                |
| Q88K24 | 50S ribosomal protein L20                                   |
| Q88KJ1 | Trigger factor                                              |
| Q88LE5 | 3-isopropylmalate dehydrogenase                             |
| Q88LS0 | Elongation factor P                                         |
| Q88M20 | Fumarate hydratase class II                                 |
| Q88MF9 | Enolase                                                     |
| Q88MG0 | 2-dehydro-3-deoxyphosphooctonate aldolase 1                 |
| Q88MH7 | Ribosome-recycling factor                                   |
| Q88MH9 | Elongation factor Ts                                        |
| Q88MV3 | 50S ribosomal protein L19                                   |
| Q88N27 | Oxaloacetate decarboxylase                                  |
| Q88N55 | 60 kDa chaperonin                                           |
| Q88N97 | 50S ribosomal protein L13                                   |
| Q88NC4 | GDP-mannose 6-dehydrogenase                                 |
| Q88NJ4 | Aspartate--tRNA(Asp/Asn) ligase                             |
| Q88NX8 | Glycerol kinase                                             |
| Q88P53 | Ornithine carbamoyltransferase, catabolic                   |
| Q88Q27 | Serine hydroxymethyltransferase 2                           |
| Q88Q71 | Chaperone protein ClpB                                      |
| Q88Q92 | Isoleucine--tRNA ligase                                     |
| Q88QL1 | DNA-directed RNA polymerase subunit alpha                   |
| Q88QL2 | 30S ribosomal protein S4                                    |
| Q88QL3 | 30S ribosomal protein S13                                   |

|            |                                                                           |
|------------|---------------------------------------------------------------------------|
| Q88QL6     | 50S ribosomal protein L15                                                 |
| Q88QL8     | 30S ribosomal protein S5                                                  |
| Q88QL9     | 50S ribosomal protein L18                                                 |
| Q88QM0     | 50S ribosomal protein L6                                                  |
| Q88QM5     | 50S ribosomal protein L14                                                 |
| Q88QM9     | 30S ribosomal protein S3                                                  |
| Q88QN2     | 50S ribosomal protein L2                                                  |
| Q88QN3     | 50S ribosomal protein L23                                                 |
| Q88QN5     | 50S ribosomal protein L3                                                  |
| Q88QN6     | 30S ribosomal protein S10                                                 |
| Q88QP8     | Elongation factor Tu-A                                                    |
| Q88QN9     | 30S ribosomal protein S7                                                  |
| Q88QP0     | 30S ribosomal protein S12                                                 |
| Q88QP1     | DNA-directed RNA polymerase subunit beta                                  |
| Q88QP2     | DNA-directed RNA polymerase subunit beta                                  |
| Q88QP4     | 50S ribosomal protein L1                                                  |
| Q88RB9     | 5-aminovalerate aminotransferase DavT                                     |
| A0A140FWS3 | Adenosylhomocysteinase                                                    |
| Q88C37     | Pyruvate carboxylase subunit B                                            |
| Q88CA3     | 4-guanidinobutyraldehyde dehydrogenase                                    |
| Q88CC3     | L-piperidine-6-carboxylate dehydrogenase                                  |
| Q88CJ8     | Polyamine:pyruvate transaminase                                           |
| Q88CU5     | Malic enzyme B                                                            |
| Q88CY3     | Glutamine synthetase                                                      |
| Q88D62     | Transketolase                                                             |
| Q88D67     | Fructose-1,6-bisphosphate aldolase                                        |
| Q88DV6     | Transcription termination/antitermination protein NusA                    |
| Q88EH7     | Lysine / arginine / ornithine ABC transporter-periplasmic binding protein |
| Q88EX0     | Chemotaxis protein CheW                                                   |
| Q88F96     | Electron transfer flavoprotein subunit beta                               |
| Q88F97     | Electron transfer flavoprotein subunit alpha                              |
| Q88FA7     | Succinate dehydrogenase flavoprotein subunit                              |
| Q88FA9     | 2-oxoglutarate decarboxylase, thiamine-requiring E1 subunit               |
| Q88FB1     | Dihydrolipoyl dehydrogenase                                               |
| Q88FB3     | Succinate--CoA ligase [ADP-forming] subunit alpha                         |
| Q88FC3     | 3-oxoacyl-[acyl-carrier-protein] synthase 1                               |
| Q88FI0     | Isocitrate lyase                                                          |
| Q88FN4     | Glycogen debranching enzyme                                               |
| Q88FR7     | Adenylosuccinate lyase                                                    |
| Q88FS1     | Isocitrate dehydrogenase [NADP]                                           |
| Q88FS2     | Isocitrate dehydrogenase [NADP]                                           |
| Q88GA5     | Glutathione reductase                                                     |
| Q88H54     | Branched-chain-amino-acid aminotransferase                                |
| Q88K29     | Nucleic acid cold-shock chaperone                                         |
| Q88K38     | Ribose ABC transporter, periplasmic ribose-binding subunit                |
| Q88K52     | Alkyl hydroperoxide reductase C                                           |

| Q88KF1                                | Aconitate hydratase B                                                          |
|---------------------------------------|--------------------------------------------------------------------------------|
| Q88KF5                                | Citrate synthase                                                               |
| Q88L46                                | Outer membrane porin F                                                         |
| Q88L53                                | Phosphoenolpyruvate synthase                                                   |
| Q88L55                                | NAD-specific glutamate dehydrogenase                                           |
| Q88LG1                                | Aminotransferase                                                               |
| Q88LL6                                | 3-oxoacyl-[acyl-carrier-protein] reductase subunit                             |
| Q88M03                                | 30S ribosomal protein S1                                                       |
| Q88M19                                | DUF2059 domain-containing protein                                              |
| Q88M48                                | ABC transporter, periplasmic binding protein                                   |
| Q88MD5                                | Ferredoxin--NADP(+) reductase                                                  |
| Q88MH1                                | Skp-like protein                                                               |
| Q88MR7                                | OmpA family protein                                                            |
| Q88MU0                                | Putative Xenobiotic reductase                                                  |
| Q88N50                                | Transcriptional regulator MvaT, P16 subunit                                    |
| Q88NB5                                | Putative amino-acid ABC transporter-binding protein YhdW                       |
| Q88NR4                                | Branched-chain amino acids ABC transporter-periplasmic leucine binding subunit |
| Q88NV5                                | Cold shock protein CapB                                                        |
| Q88NW9                                | Putative peroxiredoxin                                                         |
| Q88NY2                                | Glutamate / aspartate ABC transporter-periplasmic binding protein              |
| Q88P22                                | Inosine-5-monophosphate dehydrogenase                                          |
| Q88P38                                | Mannose/glucose ABC transporter, glucose-binding periplasmic protein           |
| Q88P44                                | Glyceraldehyde-3-phosphate dehydrogenase                                       |
| Q88P98                                | Lipopolysaccharide export system protein LptA                                  |
| Q88PG5                                | Dipeptide ABC transporter-periplasmic binding protein                          |
| Q88PL2                                | Inositol-1-monophosphatase                                                     |
| Q88PP2                                | Putative Surface adhesion protein                                              |
| Q88PT2                                | Uncharacterized protein                                                        |
| Q88Q14                                | Peptidyl-prolyl cis-trans isomerase                                            |
| Q88QU0                                | Protein kinase                                                                 |
| Q88QZ5                                | Pyruvate dehydrogenase E1 component                                            |
| Q88R38                                | Choline / betaine / carnitine ABC transporter-substrate binding protein        |
| Q88RA6                                | Periplasmic cystine-binding protein                                            |
| Q88RE1                                | Transcriptional regulatory protein AlgQ                                        |
| Q88RG2                                | Putative surface adhesion protein                                              |
| Q88RP0                                | Stress-induced peroxiredoxin, lipoyl-dependent peroxidase                      |
| Q88RQ7                                | Quinone oxidoreductase                                                         |
| <b>Exposure to curc-NPs 5.0 mg/mL</b> |                                                                                |
| <b>Uniprot</b>                        | <b>Protein name</b>                                                            |
| Q88BX0                                | ATP synthase subunit b                                                         |
| Q88BX2                                | ATP synthase subunit alpha                                                     |
| Q88BX3                                | ATP synthase gamma chain                                                       |
| Q88BX5                                | ATP synthase epsilon chain                                                     |
| Q88DD8                                | Adenylosuccinate synthetase                                                    |
| Q88DE8                                | 30S ribosomal protein S6                                                       |
| Q88DF1                                | 50S ribosomal protein L9                                                       |

|        |                                                   |
|--------|---------------------------------------------------|
| Q88DU1 | Protein GrpE                                      |
| Q88DU2 | Chaperone protein DnaK                            |
| Q88DU6 | Carbamoyl-phosphate synthase large chain          |
| Q88DU7 | Transcription elongation factor GreA              |
| Q88EI8 | Alanine--tRNA ligase                              |
| Q88EI9 | Aspartate kinase                                  |
| Q88FB2 | Succinate--CoA ligase [ADP-forming] subunit beta  |
| Q88FB9 | Chaperone protein HtpG                            |
| Q88FI4 | Elongation factor G 2                             |
| Q88G93 | Translational regulator CsrA                      |
| Q88K24 | 50S ribosomal protein L20                         |
| Q88KJ1 | Trigger factor                                    |
| Q88MF9 | Enolase                                           |
| Q88MI0 | 30S ribosomal protein S2                          |
| Q88N30 | Probable efflux pump periplasmic linker TtgA      |
| Q88N55 | 60 kDa chaperonin                                 |
| Q88NC4 | GDP-mannose 6-dehydrogenase                       |
| Q88NJ4 | Aspartate--tRNA(Asp/Asn) ligase                   |
| Q88NX8 | Glycerol kinase                                   |
| Q88P52 | Arginine deiminase                                |
| Q88P53 | Ornithine carbamoyltransferase, catabolic         |
| Q88P88 | UDP-N-acetylglucosamine 1-carboxyvinyltransferase |
| Q88Q10 | 50S ribosomal protein L21                         |
| Q88Q27 | Serine hydroxymethyltransferase 2                 |
| Q88Q71 | Chaperone protein ClpB                            |
| Q88QL2 | 30S ribosomal protein S4                          |
| Q88QL3 | 30S ribosomal protein S13                         |
| Q88QL8 | 30S ribosomal protein S5                          |
| Q88QL9 | 50S ribosomal protein L18                         |
| Q88QM0 | 50S ribosomal protein L6                          |
| Q88QM5 | 50S ribosomal protein L14                         |
| Q88QM9 | 30S ribosomal protein S3                          |
| Q88QN0 | 50S ribosomal protein L22                         |
| Q88QN2 | 50S ribosomal protein L2                          |
| Q88QP8 | Elongation factor Tu-A                            |
| Q88QN8 | Elongation factor G 1                             |
| Q88QP1 | DNA-directed RNA polymerase subunit beta          |
| Q88QP2 | DNA-directed RNA polymerase subunit beta          |
| Q88QP3 | 50S ribosomal protein L10                         |
| Q88QP4 | 50S ribosomal protein L1                          |
| Q88QQ2 | Tyrosine--tRNA ligase                             |
| Q88RB9 | 5-aminovalerate aminotransferase DavT             |
| Q88C37 | Pyruvate carboxylase subunit B                    |
| Q88CU5 | Malic enzyme B                                    |
| Q88CY3 | Glutamine synthetase                              |
| Q88D62 | Transketolase                                     |

|        |                                                                   |
|--------|-------------------------------------------------------------------|
| Q88DV6 | Transcription termination/antitermination protein NusA            |
| Q88F96 | Electron transfer flavoprotein subunit beta                       |
| Q88F97 | Electron transfer flavoprotein subunit alpha                      |
| Q88FA9 | 2-oxoglutarate decarboxylase, thiamine-requiring E1 subunit       |
| Q88FB1 | Dihydrolipoyl dehydrogenase                                       |
| Q88FB3 | Succinate--CoA ligase [ADP-forming] subunit alpha                 |
| Q88FC3 | 3-oxoacyl-[acyl-carrier-protein] synthase 1                       |
| Q88FI0 | Isocitrate lyase                                                  |
| Q88FS1 | Isocitrate dehydrogenase [NADP]                                   |
| Q88FS2 | Isocitrate dehydrogenase [NADP]                                   |
| Q88GA5 | Glutathione reductase                                             |
| Q88H54 | Branched-chain-amino-acid aminotransferase                        |
| Q88HB7 | Putative glyceraldehyde-3-phosphate dehydrogenase                 |
| Q88K29 | Nucleic acid cold-shock chaperone                                 |
| Q88KZ0 | Glyceraldehyde-3-phosphate dehydrogenase                          |
| Q88L53 | Phosphoenolpyruvate synthase                                      |
| Q88LG1 | Aminotransferase                                                  |
| Q88M03 | 30S ribosomal protein S1                                          |
| Q88M08 | DNA gyrase subunit A                                              |
| Q88M19 | DUF2059 domain-containing protein                                 |
| Q88M48 | ABC transporter, periplasmic binding protein                      |
| Q88NW9 | Putative peroxiredoxin                                            |
| Q88NY2 | Glutamate / aspartate ABC transporter-periplasmic binding protein |
| Q88PL2 | Inositol-1-monophosphatase                                        |
| Q88PT2 | Uncharacterized protein                                           |
| Q88QU0 | Protein kinase                                                    |
| Q88QZ5 | Pyruvate dehydrogenase E1 component                               |
| Q88RQ7 | Quinone oxidoreductase                                            |

---
